# Supplementary material for: Association between Egg Consumption and Cholesterol Concentration: A Systematic Review and Meta-Analysis of Randomized Controlled Trials
Source: PubMed Central journal article supplement (PMC7400894; doi:10.3390/nu12071995), 2020-07-04
Supplement: nutrients-12-01995-s001.pdf [file nutrients-12-01995-s001.pdf]

# **consumption and cholesterol concentration:**

## **A systematic review and meta-Analysis of randomized controlled trials (Supplementary Figures)**

**Figure S1.** Sensitivity analysis of LDL-c/HDL-c ratio

**Figure S2.** Small study effects in LDL-c/HDL-c ratio

**Figure S3.** Sensitivity analysis of LDL-C

**Figure S4.** Small study effects in LDL-C

**Figure S5.** Sensitivity analysis of LDH-C

**Figure S6.** Small study effects in LDH-C

# Figure S1

## Sensitivity analysis of LDL/HDL ratio

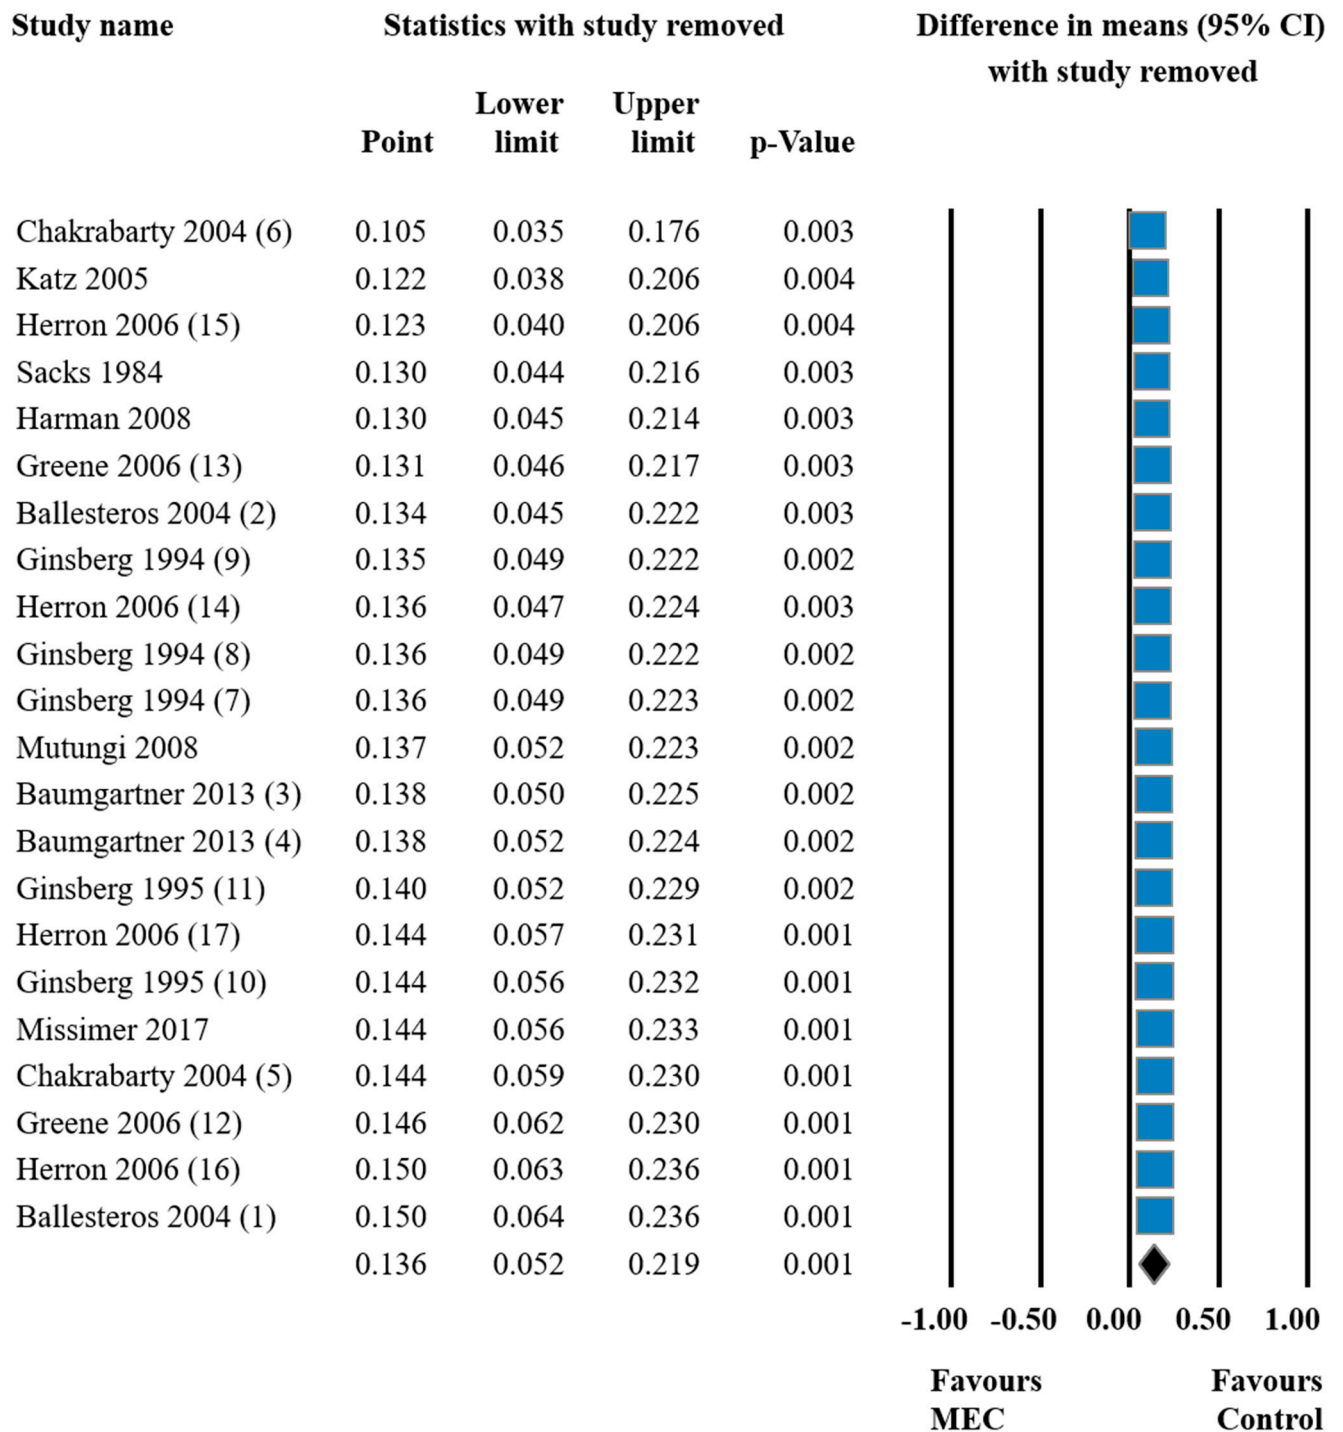

# Figure S2

## Small study effects in LDL/HDL ratio

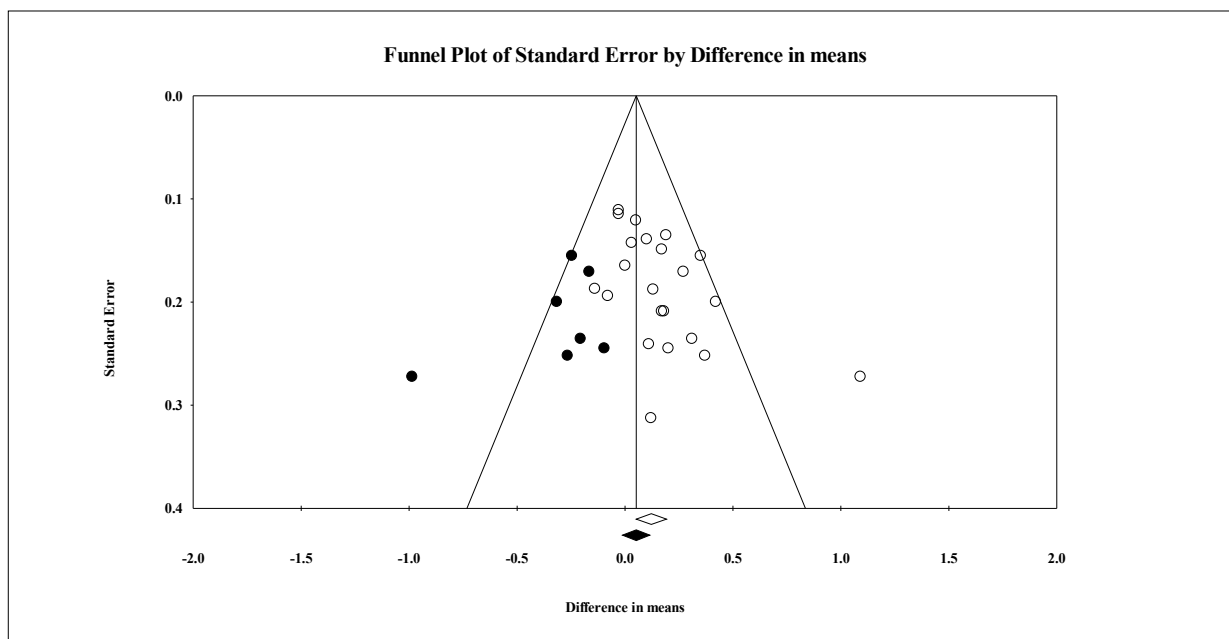

### Egger's regression intercept

|                            |          |
|----------------------------|----------|
| Intercept                  | 2.13767  |
| Standard error             | 0.78999  |
| 95% lower limit (2-tailed) | 0.48978  |
| 95% upper limit (2-tailed) | 3.78557  |
| t-value                    | 2.70594  |
| df                         | 20.00000 |
| P-value (1-tailed)         | 0.00680  |
| P-value (2-tailed)         | 0.01360  |

### Duval and Tweedie's trim and fill

|                        | Fixed Effects   |                |                            | Random Effects |                            |          | Q Value |
|------------------------|-----------------|----------------|----------------------------|----------------|----------------------------|----------|---------|
|                        | Studies Trimmed | Point Estimate | Lower Limit<br>Upper Limit | Point Estimate | Lower Limit<br>Upper Limit |          |         |
| <b>Observed values</b> |                 | 0.12205        | 0.05221<br>0.19188         | 0.13563        | 0.05239<br>0.21887         | 28.05723 |         |
| <b>Adjusted values</b> | 7               | 0.05175        | -0.01174<br>0.11525        | 0.05583        | -0.03972<br>0.15139        | 58.42167 |         |

# Figure S3

## Sensitivity analysis of LDL-C

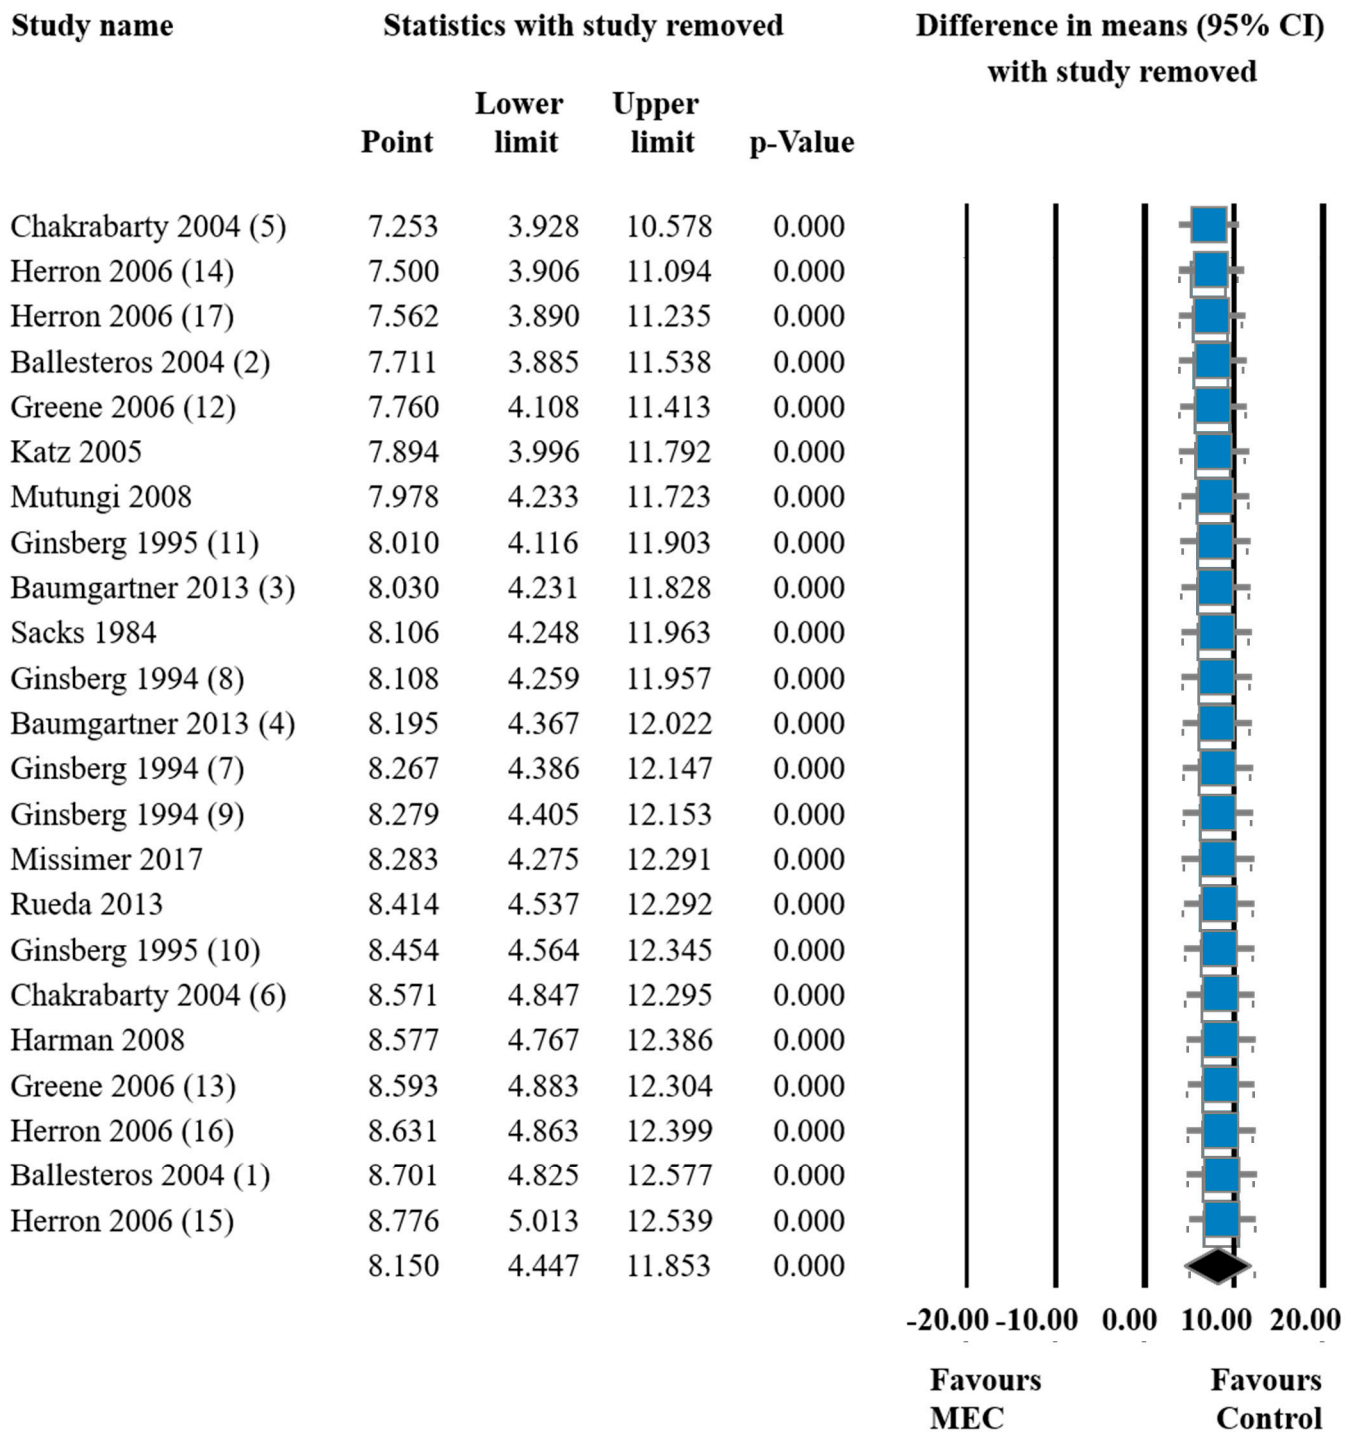

# Figure S4

## Small study effects in LDL-C

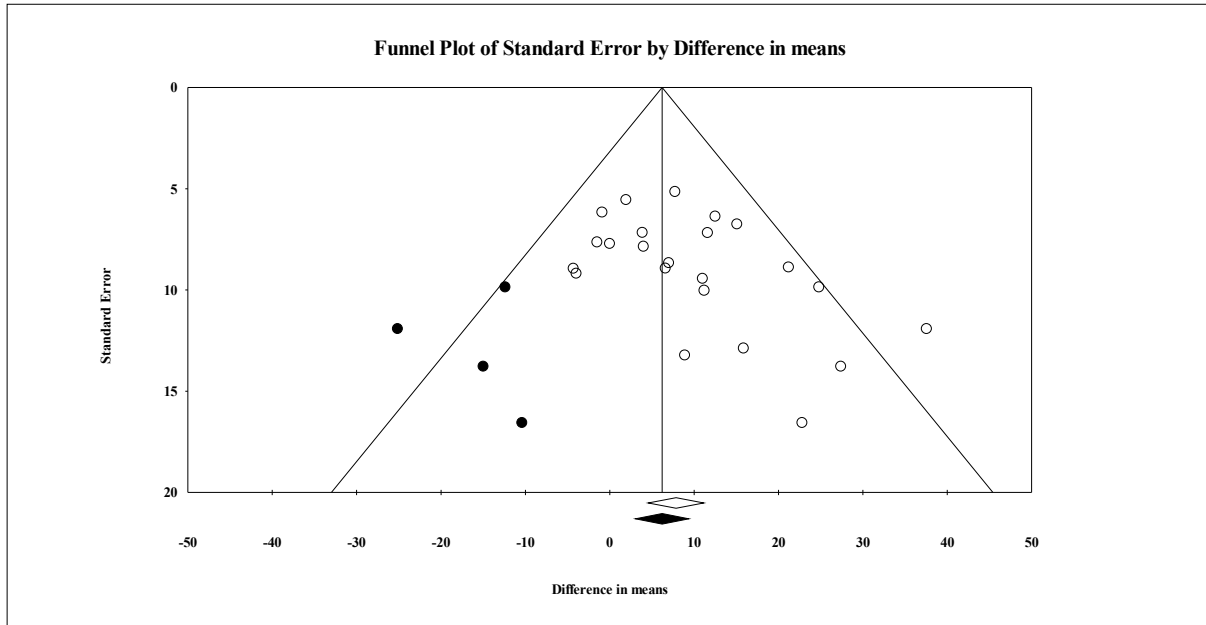

### Egger's regression intercept

|                            |          |
|----------------------------|----------|
| Intercept                  | 1.78204  |
| Standard error             | 0.76914  |
| 95% lower limit (2-tailed) | 0.18253  |
| 95% upper limit (2-tailed) | 3.38154  |
| t-value                    | 2.31694  |
| df                         | 21.00000 |
| P-value (1-tailed)         | 0.01535  |
| P-value (2-tailed)         | 0.03069  |

### Duval and Tweedie's trim and fill

|                        | Fixed Effects   |                |             | Random Effects |                |             | Q Value     |          |
|------------------------|-----------------|----------------|-------------|----------------|----------------|-------------|-------------|----------|
|                        | Studies Trimmed | Point Estimate | Lower Limit | Upper Limit    | Point Estimate | Lower Limit | Upper Limit |          |
| <b>Observed values</b> |                 | 7.85470        | 4.56287     | 11.14652       | 8.15019        | 4.44732     | 11.85306    | 26.60672 |
| <b>Adjusted values</b> | 4               | 6.20659        | 3.03026     | 9.38292        | 6.31583        | 2.13124     | 10.50041    | 41.41692 |

# Figure S5

## Sensitivity analysis of HDL-C

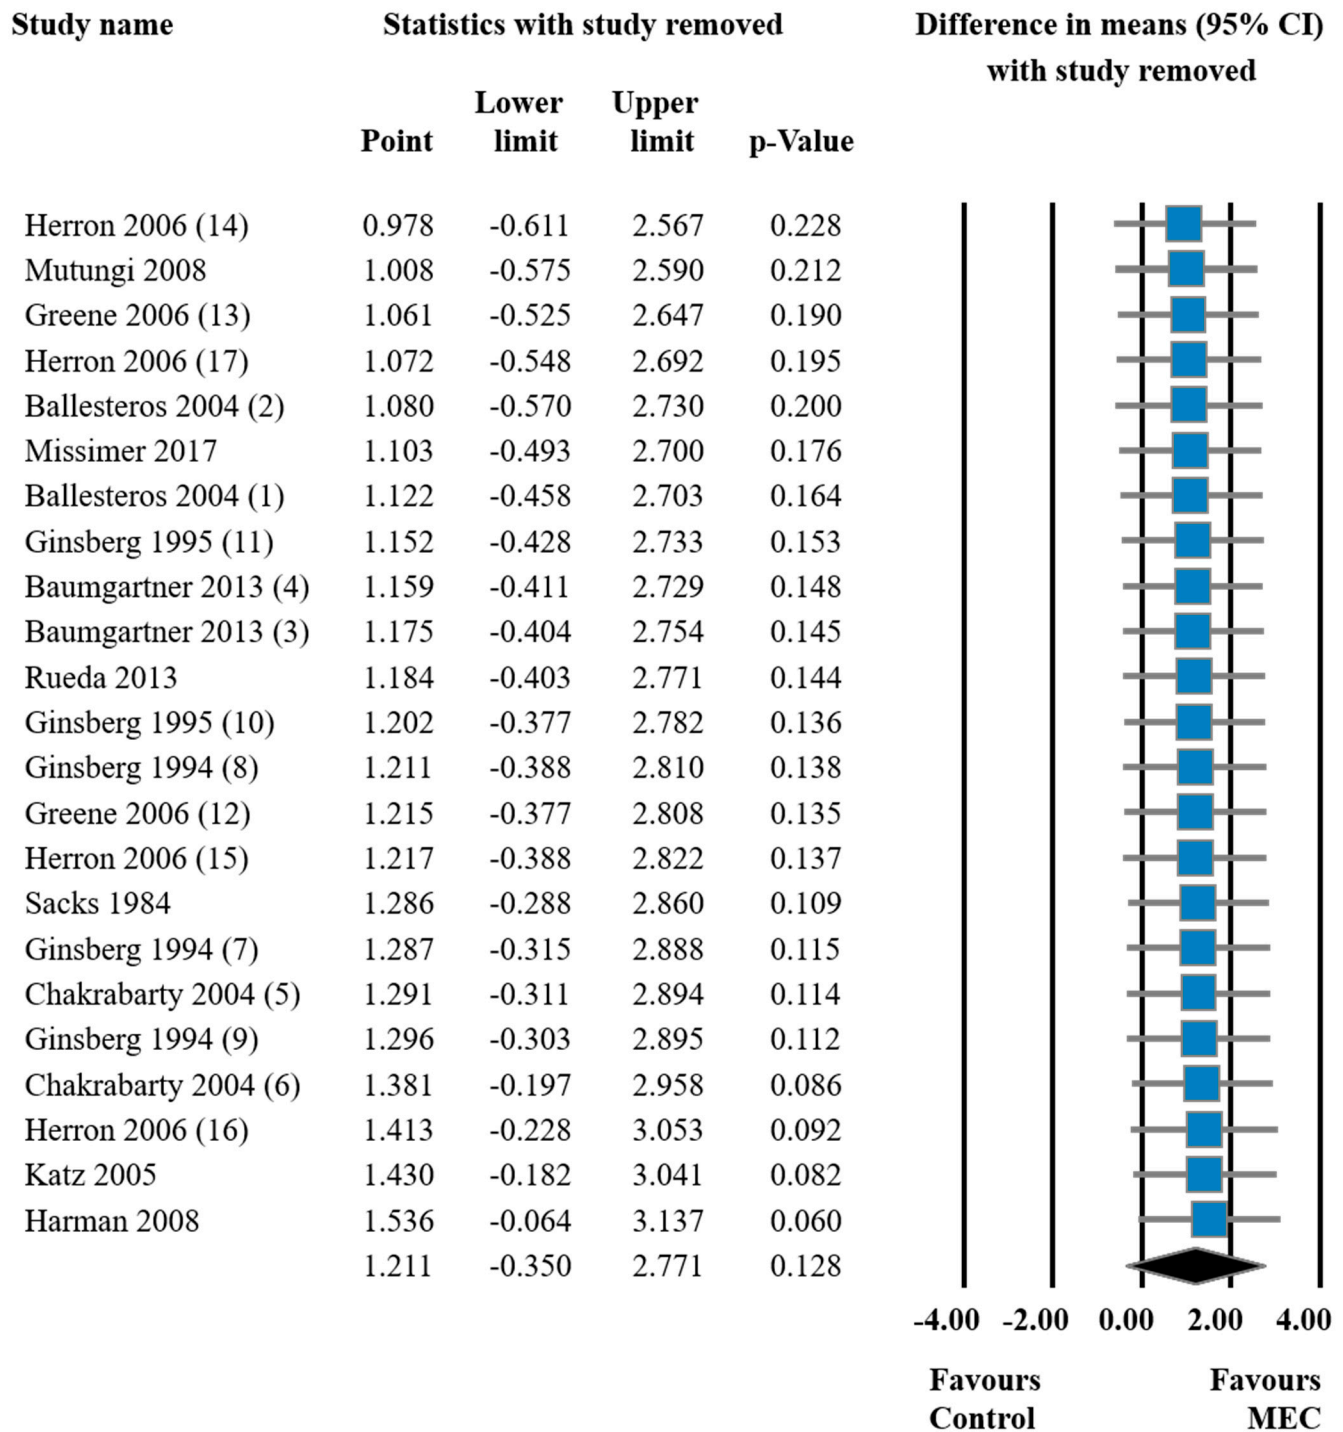

# Figure S6

## Small study effects in HDL-C

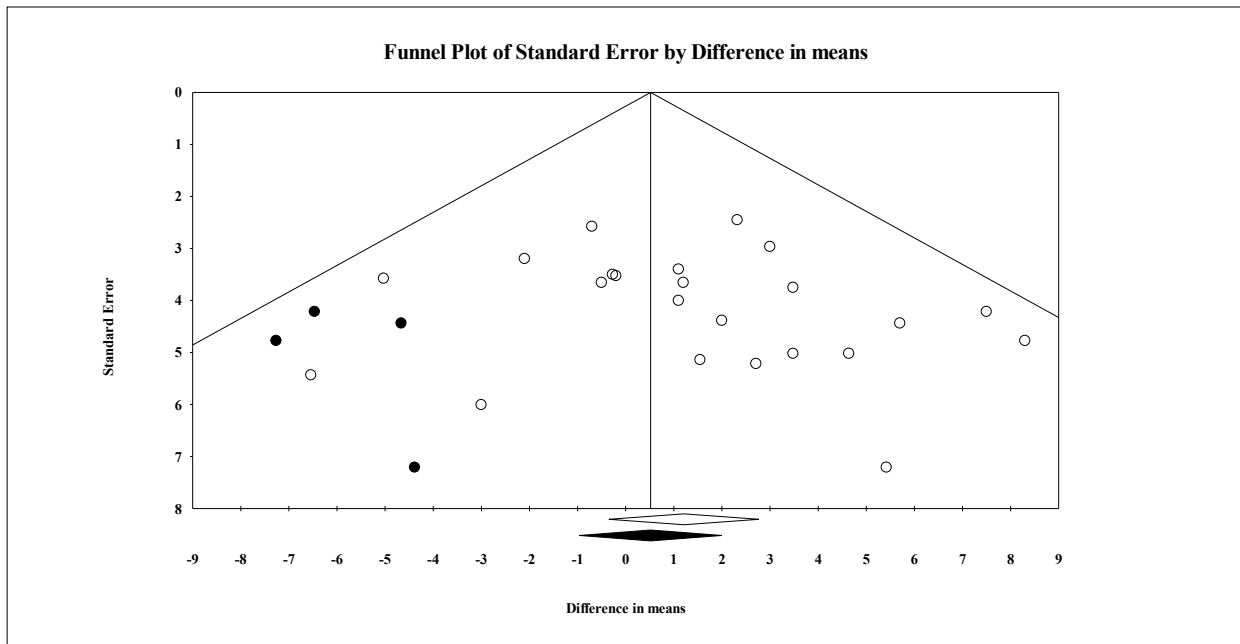

### Egger's regression intercept

|                            |          |
|----------------------------|----------|
| Intercept                  | 0.61440  |
| Standard error             | 0.69262  |
| 95% lower limit (2-tailed) | -0.82597 |
| 95% upper limit (2-tailed) | 2.05478  |
| t-value                    | 0.88708  |
| df                         | 21.00000 |
| P-value (1-tailed)         | 0.19254  |
| P-value (2-tailed)         | 0.38508  |
